# Supplementary material
Source: PubMed Central journal article supplement (PMC4456449)
Supplement: MCB.01498-14_zmb999100880so1.pdf [file MCB.01498-14_zmb999100880so1.pdf]

## Supplemental Material

**Supplemental Figure S1:** Stat1 expression and Stat1 phosphorylation in wt and IRF9-deficient mice. **A)** Q-PCR analysis of Stat1 mRNA expression in colon tissue of healthy or 5d DSS treated WT and IRF9<sup>-/-</sup> mice normalized to housekeeping gene OAZ1. Data are presented as mean +/- SEM \*p < 0.05, \*\*p < 0.01; Mann Whitney U test. **B)** Representative western blot analysis (2 samples from different mice each) of total Stat1 levels in mesenteric lymph nodes, spleens and colons of WT and Irf9<sup>-/-</sup> mice (upper six panels). The bottom panels show colonic Stat1 levels of mice 5days after DSS treatment. **C)** Stat1 phosphorylation upon IFN $\gamma$  treatment in isolated colon epithelial cells (3 samples each).

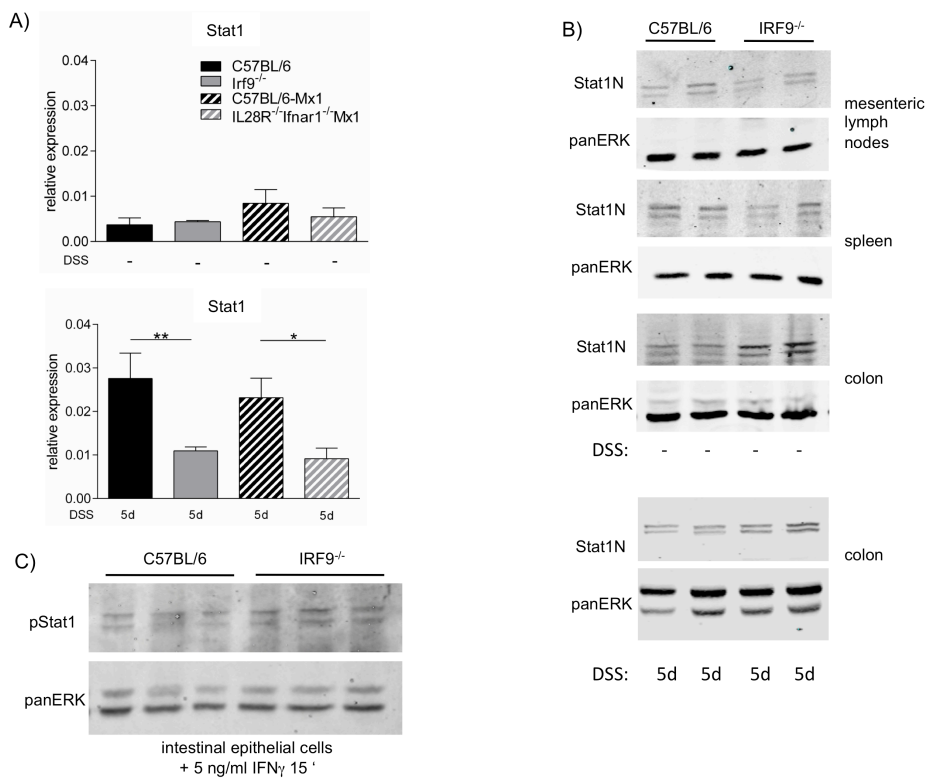

**Table S1.** Primer sequences used for q-PCR and ChIP

| Gene name                    | Forward primer (5'->3')    | Reverse primer (5'->3')      |
|------------------------------|----------------------------|------------------------------|
| IFN-III (IFN12 and IFN13)    | AGCTGCAGGCCTTCAAAAAG       | TGGGAGTGAATGTGGCTCAG         |
| IL28R $\alpha$               | TGCAGATTCCTCTCCAGCAA       | GTCTTCACCCCCTGAAACCA         |
| OAZ1 (housekeeping gene)     | GTGGTGGCCTCTACATCGAG       | AGCAGATGAAAACGTGGTCAG        |
| IRF1                         | TGCTGTGCTGCTGGTCTT         | CCTTCATTCCGTCCTGTCCTT        |
| IRF7                         | ATTTTCGGTCGTAGGGATCTGG     | GCACAGCGGAAGTTGGTCT          |
| IFIT2                        | AGAACCAAACGAGAGAGTGA AG    | TCCAGACGGTAGTTCGCAATG        |
| GBP2                         | ACAACCTCAGCTAACTTTGTGGG    | TGATACACAGGCGAGGCATATTA      |
| DDX58                        | AAGAGCCAGAGTGTCAAGAATC     | AGCTCCAGTTGGTAATTTCTTGG      |
| ISG15                        | AGTGATGCTAGTGGTACAGAA CT   | CAGTCTGCGTCAGAAAGACCT        |
| CXCL9                        | GGCACGATCCACTACAAATCC      | GGTTTGATCTCCGTTCTTCAGT       |
| CXCL10                       | TGCGAGCCTATCCTGCCACGTG     | CCGGGGTGTGTGCGTGGCTTCA       |
| CXCR3                        | TACCTTGAGGTTAGTGAACGTCA    | CGCTCTCGTTTTCCCATAATC        |
| CIITA                        | TGCGTGTGATGGATGTCCAG       | CCAAAGGGGATAGTGGGTGTC        |
| Cxcl10 E1 ChIP               | GAGAGAAGGAAGATGAGAATTAAGC  | GCAACCCGAGGGAAGTC            |
| Cxcl10 E2 ChIP               | GCCTCTGCTTCTGAGCTTCTTCTAAG | GGCACATTTGCTTCGCTAGTATTTATTC |
| Mx2 IFN response region ChIP | ACCCAGCCAAGGCCCCCTTA       | GCAGCTGCCAGGGCTCAGAC         |
